# Supplementary material
Source: MDPI journal article supplement (https://www.mdpi.com/2073-4441/12/3/764)
Supplement: s1 [file s1]

Article

# Effect of Primary Variables on A Confined Plunging Liquid Jet Reactor

Bader S. Al-Anzi <sup>1,2,\*</sup>

## Supplementary Information

Figure S1 is an actual impression that shows the role of the mesh installed inside the downcomer. It is evident that a dense group of fine bubbles ejected at the bottom of the downcomer. This increased the net entrainment rate and hence the performance of the system as an aerator.

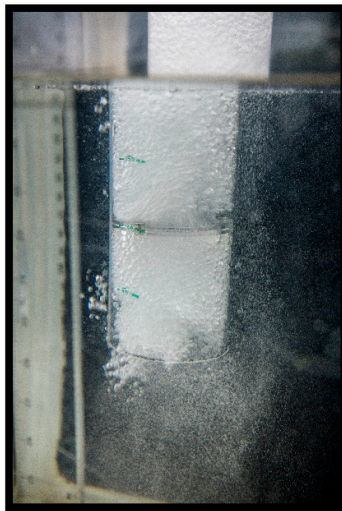

**Figure S1.** Image shows very fine bubbles leaving the downcomer due to mesh effect.
